# Supplementary material
Source: Springer Nature journal article supplement (https://www.springermedizin.de/resource/supplementary/13014_2010_366_MOESM4_ESM.pdf/9633638)

# Biochemical relapse free survival

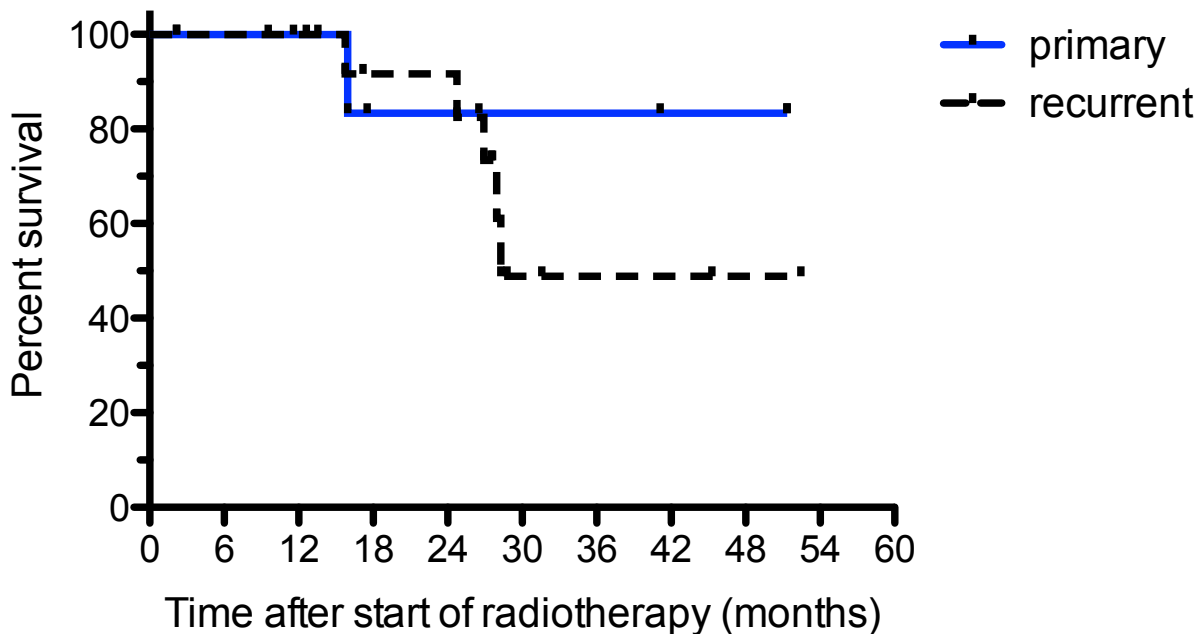

Supplement: MOESM4 [file 9633638]
